# Supplementary material for: Role of P-Glycoprotein Inhibitors in the Bioavailability Enhancement of Solid Dispersion of Darunavir
Source: Hindawi journal article supplement (doi:10.1155/2017/8274927), 2017-01-01
Supplement: f1 [file 8274927.f1.pdf]

## **SUPPLEMENTARY MATERIAL**

### **Supplementary Material Legends**

Table S.1: Mean solubility of drug in different polymers at three different ratios

Figure S.1: Regression plot showing correlation coefficient of the drug release at various time intervals

Figure S.2: Parameters estimation of responses of drug release studies at 30 min.

Figure S.3: Parameters estimation for responses of drug release studies at 60 min.

Figure S.4: FTIR of (a) DRV (b) Kolliphor TPGS and (c) SD7=SD of DRV with KolliphorTPGS

Table S.1: Mean solubility of drug in different polymers at three different ratios

| Polymer        | Mean solubility $\pm$ S.D. (mg/ml) (n=3) |                       |                         |                       |
|----------------|------------------------------------------|-----------------------|-------------------------|-----------------------|
|                | Drug:Polymer<br>(1:0.5)                  | Drug:Polymer<br>(1:1) | Drug:Polymer<br>(1:1.5) | Drug:Polymer<br>(1:2) |
| Soluplus       | 0.346 $\pm$ 0.017                        | 0.535 $\pm$ 0.016     | 0.654 $\pm$ 0.019       | 0.823 $\pm$ 0.023     |
| Kolliphor TPGS | 0.427 $\pm$ 0.016                        | 0.622 $\pm$ 0.024     | 0.681 $\pm$ 0.020       | 0.922 $\pm$ 0.025     |
| Tween 80       | 0.270 $\pm$ 0.019                        | 0.397 $\pm$ 0.019     | 0.595 $\pm$ 0.016       | 0.720 $\pm$ 0.020     |
| PVP-K30        | 0.168 $\pm$ 0.018                        | 0.232 $\pm$ 0.016     | 0.243 $\pm$ 0.016       | 0.316 $\pm$ 0.019     |
| HPMC E5        | 0.167 $\pm$ 0.007                        | 0.198 $\pm$ 0.013     | 0.249 $\pm$ 0.018       | 0.243 $\pm$ 0.019     |
| Poloxamer 188  | 0.216 $\pm$ 0.014                        | 0.281 $\pm$ 0.015     | 0.397 $\pm$ 0.013       | 0.400 $\pm$ 0.012     |

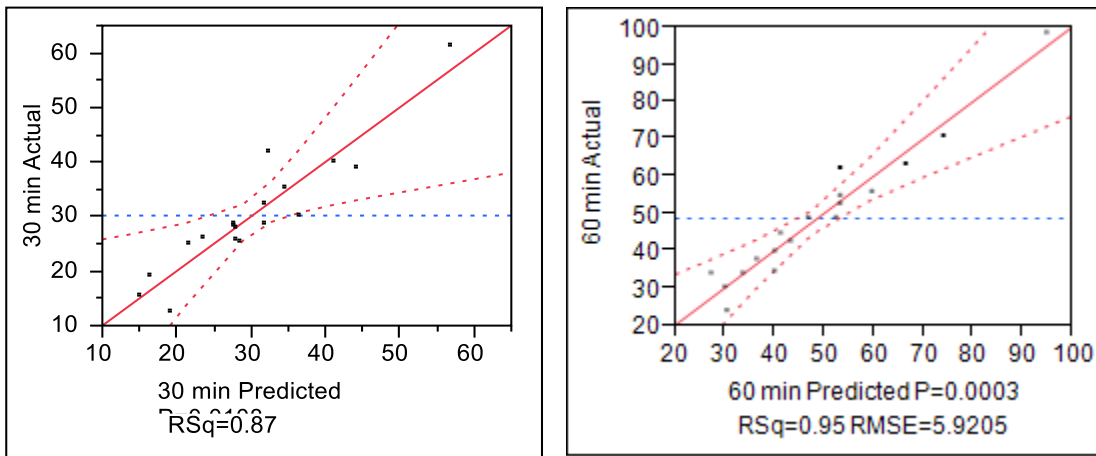

Figure S.1: Regression plot showing correlation coefficient of the drug release at various time intervals

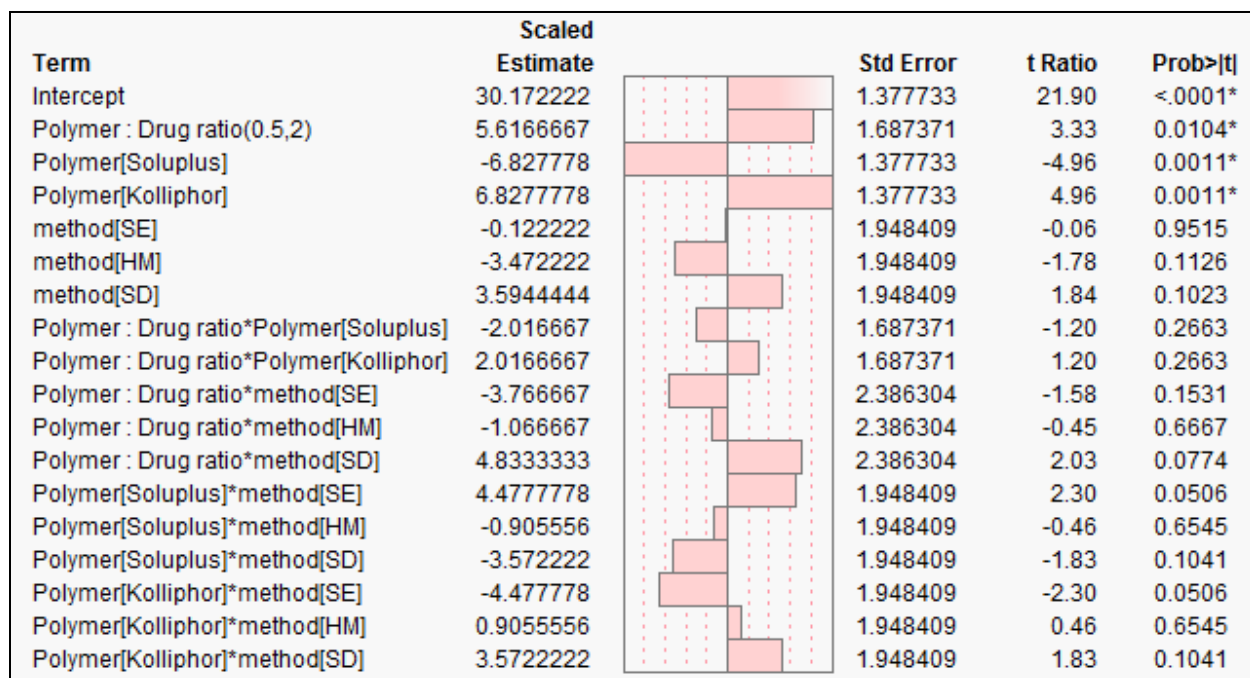

Figure S.2: Parameters estimation of responses of drug release studies at 30 min.

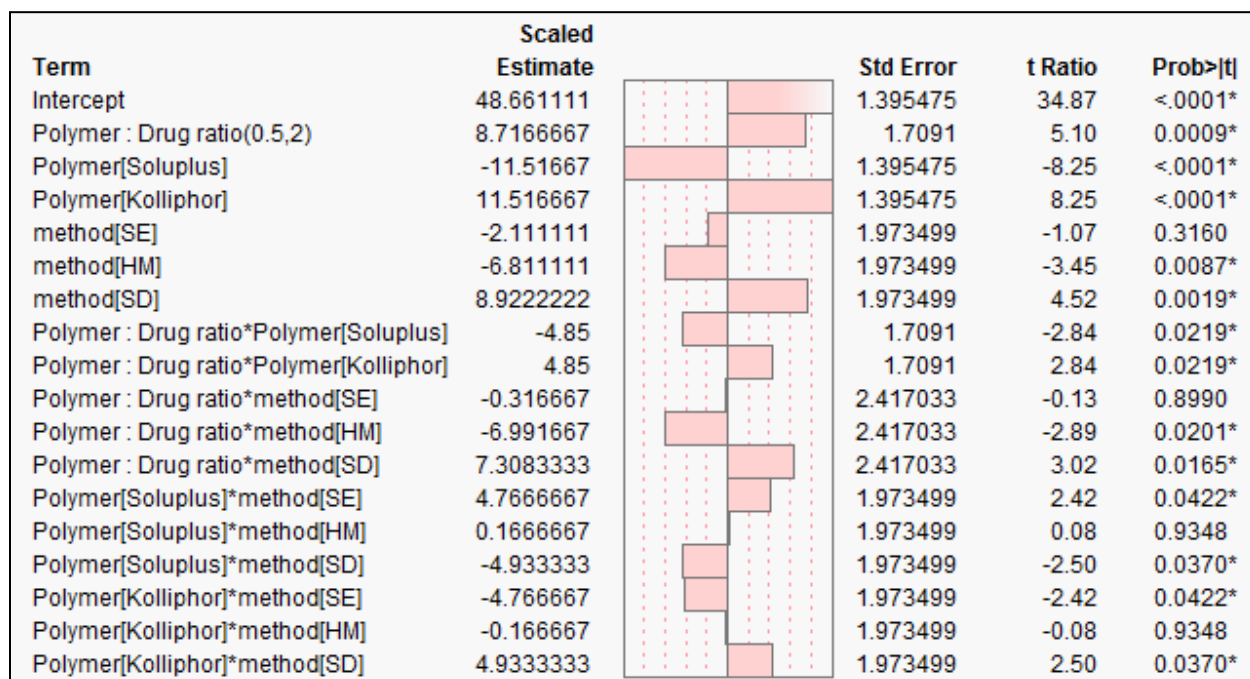

Figure S.3: Parameters estimation for responses of drug release studies at 60 min.

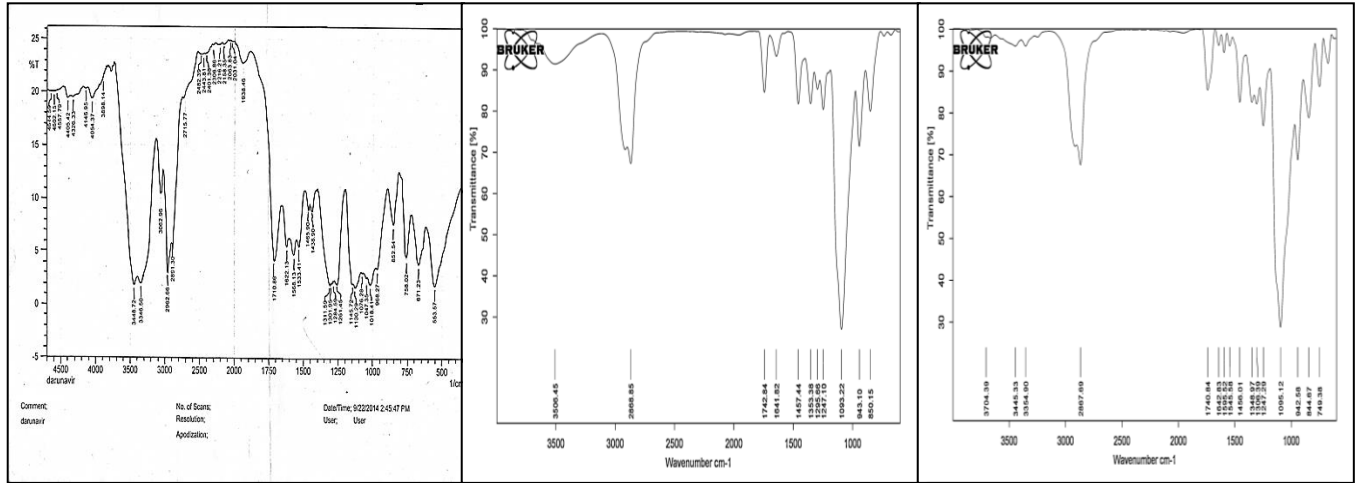

(a)

(b)

(c)

Figure S.4: FTIR of (a) DRV (b) Kolliphor TPGS and (c) SD7=SD of DRV with Kolliphor TPGS
